# Supplementary material
Source: Springer Nature journal article supplement (https://www.springermedizin.de/resource/supplementary/12879_2012_2396_MOESM1_ESM.pdf/9444494)
Supplement: MOESM1 [file 9444494]

| Protocol and Center Number | Responsible IRB Name and Address(es)                                                                       |
|----------------------------|------------------------------------------------------------------------------------------------------------|
| P05216-01                  | CPP "Sud-Est II"<br>Hopital Hotel Dieu<br>1 Place de l'Hopital, Porte 16<br>Lyon Cedex 02 69288<br>France  |
| P05216-02                  | CPP "Sud-Est II"<br>Hopital Hotel Dieu<br>1 Place de l'Hopital, Porte 16<br>Lyon Cedex 02 69288<br>France  |
| P05216-03                  | CPP "Sud-Est II"<br>Hopital Hotel Dieu<br>1 Place de l'Hopital, Porte 16<br>Lyon Cedex 02 69288<br>France  |
| P05216-04                  | CPP "Sud-Est II",<br>Hopital Hotel Dieu<br>1 Place de l'Hopital, Porte 16<br>Lyon Cedex 02 69288<br>France |
| P05216-05                  | CPP "Sud-Est II"<br>Hopital Hotel Dieu<br>1 Place de l'Hopital, Porte 16<br>Lyon Cedex 02, 69288<br>France |
| P05216-06                  | CPP "Sud-Est II"<br>Hopital Hotel Dieu<br>1 Place de l'Hopital, Porte 16<br>Lyon Cedex 02, 69288<br>France |
| P05216-07                  | CPP "Sud-Est II"<br>Hopital Hotel Dieu<br>1 Place de l'Hopital, Porte 16<br>Lyon Cedex 02, 69288           |

| Protocol and Center Number | Responsible IRB Name and Address(es)                                                                                                                                                                   |
|----------------------------|--------------------------------------------------------------------------------------------------------------------------------------------------------------------------------------------------------|
|                            | France                                                                                                                                                                                                 |
| P05216-08                  | CPP "Sud-Est II"<br>Hopital Hotel Dieu<br>1 Place de l'Hopital, Porte 16<br>Lyon Cedex 02, 69288<br>France                                                                                             |
| P05216-09                  | BIDMC Committee on Clinical Investigations<br>330 Brookline Ave, E/FN-201<br>Boston MA, 02215<br>USA                                                                                                   |
| P05216-10                  | Saint Louis University Institutional Review Board<br>3556 Caroline Street, Room 110<br>Saint Louis MO, 63104<br>USA                                                                                    |
| P05216-11                  | Tulane University<br>1440 Tulane Ave. TW36 Tidewater Bldg, Ste 1705<br>Office of Human Research Protection<br>New Orleans LA, 70112-2699<br>USA                                                        |
| P05216-12                  | WIRB<br>3535 7th Ave. Southwest<br>Olympia WA, 98502 - 5010<br>USA                                                                                                                                     |
| P05216-13                  | Western Institutional Review Board<br>3535 7th Avenue SouthWest<br>Olympia WA, 98502-5010<br>USA                                                                                                       |
| P05216-14                  | University of Arizona<br>1618 East Helen Street<br>Human Subject's Committee<br>Tucson AZ, 85719<br>USA<br><br>Western Institutional Review Board<br>3535 7th Ave. SW<br>Olympia WA, 98502-5010<br>USA |
| P05216-18                  | Western Institutional Review Board<br>3535 Seventh Avenue SW<br>Olympia WA, 98502-5010<br>USA                                                                                                          |
| P05216-19                  | Northwestern University<br>Office for Sponsored Research (OSR)<br>750 N. Lake Shore Drive<br>Rubloff 7th Floor<br>Chicago IL, 60611-3008<br>USA                                                        |
| P05216-20                  | Western Institutional Review Board<br>3535 7th Ave. SW<br>Olympia WA, 98502-5010<br>USA                                                                                                                |
| P05216-21                  | Western Institutional Review Board<br>3535 Seventh Avenue SW<br>Olympia WA, 98502-5010<br>USA                                                                                                          |
| P05216-22                  | Western Institutional Review Board                                                                                                                                                                     |

| Protocol and Center Number | Responsible IRB Name and Address(es)                                                                                                                                                                                                         |
|----------------------------|----------------------------------------------------------------------------------------------------------------------------------------------------------------------------------------------------------------------------------------------|
|                            | 3535 7th Ave. SW<br>Olympia WA, 98502-5010<br>USA                                                                                                                                                                                            |
| P05216-32                  | IUPUI & Clarian IRB Institution Review Boards<br>541 Clinical Drive<br>Clinical Building 365/Rm 618<br>INDIANAPOLIS IN, 46202-5111<br>USA<br><br>Research and Sponsored Programs<br>620 Union Drive, Room 618<br>Indianapolis, IN 46202-5167 |
| P05216-33                  | Western Institutional Review Board<br>3535 Seventh Avenue, SW<br>Olympia WA, 98508-5010<br>USA                                                                                                                                               |
| P05216-34                  | University of Texas Southwestern Medical Center<br>Institutional Review Board<br>5323 Harry Hines Blvd, Room C1.206<br>Dallas TX, 75390-8843<br>USA                                                                                          |
| P05216-35                  | Dean Institutional Review Board<br>2711 Allen Blvd., Suite 300<br>Middleton WI, 53562<br>USA                                                                                                                                                 |
| P05216-36                  | Western Institutional Board<br>3535 7th Avenue Southwest<br>Olympia WA, 98502-5010<br>USA                                                                                                                                                    |
| P05216-37                  | Penn State Hershey College of Med<br>Human Subj Prot. Office<br>600 Centerview Drive<br>Rm 1140, MS-A115, PO 855<br>Acad. Support Bldg<br>Hershey PA, 17033<br>USA                                                                           |
| P05216-38                  | Duke University Health System<br>Institutional Review Board<br>Hock Plaza,<br>2424 Erwin Road, Suite 405<br>Campus Box 2712<br>Durham NC, 27705<br>USA                                                                                       |
| P05216-39                  | VA Long Beach Healthcare System<br>IRB<br>5901 East Seventh Street<br>Mail Code 09/151<br>Long Beach CA, 90822<br>USA<br><br>Institutional Review Board<br>Subcommittee on Human Subjects<br>5901 East Seventh Street                        |

| Protocol and Center Number | Responsible IRB Name and Address(es)                                                                                                                                                                                                                                                   |
|----------------------------|----------------------------------------------------------------------------------------------------------------------------------------------------------------------------------------------------------------------------------------------------------------------------------------|
|                            | 3535 7th Avenue Southwest<br>OLYMPIA WA, 98502-5010<br>USA                                                                                                                                                                                                                             |
| P05216-23                  | Western Institutional Review Board<br>3535 Seventh Avenue SW<br>Olympia WA, 98502-5010<br>USA                                                                                                                                                                                          |
| P05216-24                  | Lancaster General Hospital Institutional Review Committee<br>555 North Duke Street<br>Lancaster PA, 17604<br>USA                                                                                                                                                                       |
| P05216-25                  | Western Institutional Review Board<br>3535 Seventh Avenue SW<br>Olympia WA, 98502-5010<br>USA                                                                                                                                                                                          |
| P05216-26                  | Henry Ford Health System<br>2799 W. Grand Blvd. Henry Ford Hospital CFP-046<br>Institutional Review Board<br>Henry Ford Hospital CFP-046<br>Detroit MI, 48202<br>USA                                                                                                                   |
| P05216-27                  | University of South Alabama<br>IRB<br>307 University Blvd. CSAB 138<br>Mobile AL, 36688<br>USA                                                                                                                                                                                         |
| P05216-28                  | Thomas Jefferson University<br>Department of Human Subject Protection<br>1015 Chestnut Street, Suite 1100<br>Philadelphia PA, 19107<br>USA                                                                                                                                             |
| P05216-29                  | Weill Cornell Medical College Institutional Review Board<br>407 East 61st Street<br>1st Floor<br>New York NY, 10065<br>USA<br><br>Weill Medical College of Cornell University<br>Committee on Human Rights in Research<br>425 E. 61st Street Suite DV-301<br>New York NY, 10065<br>USA |
| P05216-30                  | Louisiana State University Health Sciences Center<br>IRB<br>1501 Kings Hwy<br>Shreveport LA, 71103<br>USA<br><br>Louisiana State University Health Sciences Center<br>Institutional Review Board<br>2627 Linwood Ave Bldg 2<br>Shreveport LA, 71103<br>USA                             |
| P05216-31                  | WIRB                                                                                                                                                                                                                                                                                   |

| Protocol and Center Number | Responsible IRB Name and Address(es)                                                                                                                                                                                                         |
|----------------------------|----------------------------------------------------------------------------------------------------------------------------------------------------------------------------------------------------------------------------------------------|
|                            | 3535 7th Ave. SW<br>Olympia WA, 98502-5010<br>USA                                                                                                                                                                                            |
| P05216-32                  | IUPUI & Clarian IRB Institution Review Boards<br>541 Clinical Drive<br>Clinical Building 365/Rm 618<br>INDIANAPOLIS IN, 46202-5111<br>USA<br><br>Research and Sponsored Programs<br>620 Union Drive, Room 618<br>Indianapolis, IN 46202-5167 |
| P05216-33                  | Western Institutional Review Board<br>3535 Seventh Avenue, SW<br>Olympia WA, 98508-5010<br>USA                                                                                                                                               |
| P05216-34                  | University of Texas Southwestern Medical Center<br>Institutional Review Board<br>5323 Harry Hines Blvd, Room C1.206<br>Dallas TX, 75390-8843<br>USA                                                                                          |
| P05216-35                  | Dean Institutional Review Board<br>2711 Allen Blvd., Suite 300<br>Middleton WI, 53562<br>USA                                                                                                                                                 |
| P05216-36                  | Western Institutional Board<br>3535 7th Avenue Southwest<br>Olympia WA, 98502-5010<br>USA                                                                                                                                                    |
| P05216-37                  | Penn State Hershey College of Med<br>Human Subj Prot. Office<br>600 Centerview Drive<br>Rm 1140, MS-A115, PO 855<br>Acad. Support Bldg<br>Hershey PA, 17033<br>USA                                                                           |
| P05216-38                  | Duke University Health System<br>Institutional Review Board<br>Hock Plaza,<br>2424 Erwin Road, Suite 405<br>Campus Box 2712<br>Durham NC, 27705<br>USA                                                                                       |
| P05216-39                  | VA Long Beach Healthcare System<br>IRB<br>5901 East Seventh Street<br>Mail Code 09/151<br>Long Beach CA, 90822<br>USA<br><br>Institutional Review Board<br>Subcommittee on Human Subjects<br>5901 East Seventh Street                        |

| Protocol and Center Number | Responsible IRB Name and Address(es)                                                                                                                                                                                                                                                                                     |
|----------------------------|--------------------------------------------------------------------------------------------------------------------------------------------------------------------------------------------------------------------------------------------------------------------------------------------------------------------------|
|                            | Building 162, Room 112<br>Long Beach, CA 90822                                                                                                                                                                                                                                                                           |
| P05216-41                  | Western Institutional Review Board<br>3535 Seventh Avenue, SW<br>Olympia WA, 98502-5010<br>USA                                                                                                                                                                                                                           |
| P05216-42                  | Kaiser Permanente Southern California<br>Institutional Review Board<br>393 East Walnut St., 2nd Floor<br>Pasadena CA, 91188<br>USA                                                                                                                                                                                       |
| P05216-43                  | Kaiser Permanente Northern IRB (KPNC IRB)<br>1800 Harris 16th Floor<br>Oakland CA, 94612<br>USA                                                                                                                                                                                                                          |
| P05216-44                  | Cedars-Sinai Medical Center<br>Institutional Review Board<br>Office of Research Compliance<br>8383 Wilshire Blvd., Suite 742<br>Beverly Hills CA, 90211<br>USA<br><br>Sinai Medical Center Institutional Review Board<br>8383 Wilshire Blvd., Suite 302<br>Office of Research Compliance<br>Los Angeles CA, 90211<br>USA |
| P05216-46                  | WIRB<br>3535 7th Ave. SW<br>Olympia WA, 98502-5010<br>USA                                                                                                                                                                                                                                                                |
| P05216-47                  | Western Institutional Review Board<br>3535 7th Ave. SW<br>Olympia WA, 98502-5010<br>USA                                                                                                                                                                                                                                  |
| P05216-48                  | Office of Research Integrity<br>19 Hagood Ave - Room 601<br>Charleston SC, 29425<br>USA                                                                                                                                                                                                                                  |
| P05216-49                  | UC Davis<br>Office of Research IRB Administration<br>CRISP Building, Suite 1400, Rm 1429<br>2921 Stockton Blvd<br>Sacramento, CA 95817<br>USA                                                                                                                                                                            |
| P05216-50                  | WIRB<br>3535 7th Ave. SW<br>Olympia WA, 98502-5010<br>USA                                                                                                                                                                                                                                                                |
| P05216-51                  | WIRB<br>3535 7th Ave. SW<br>Olympia WA, 98502-5010<br>USA                                                                                                                                                                                                                                                                |

|           |                                                                                                                                                                                                                                                                                                                          |
|-----------|--------------------------------------------------------------------------------------------------------------------------------------------------------------------------------------------------------------------------------------------------------------------------------------------------------------------------|
| P05216-52 | <p>University of Miami<br/> Human Subjects Research Office<br/> 1500 NW 12th Ave Suite 1000<br/> Human Subjects Research Office<br/> Suite 1000<br/> Miami FL, 33136<br/> USA</p>                                                                                                                                        |
| P05216-53 | <p>University of Cincinnati Medical Center<br/> Investigational Review Board<br/> 51 Goodman Drive Suite 300<br/> Cincinnati OH, 45221<br/> USA</p> <p>University of Cincinnati Medical Center<br/> Institutional Review Board<br/> G-08, Wherry Hall, Eden Ave.<br/> P.O. Box 670567<br/> Cincinnati, OH 45267-0567</p> |
| P05216-54 | <p>McGuire Institutional Review Board<br/> McGuire DVAMC<br/> 1201 Broad Rock Blvd. Room 3C-126<br/> Richmond VA, 23249<br/> USA</p> <p>Western Institutional Review Board<br/> 3535 Seventh Avenue SW<br/> Olympia WA, 98502<br/> USA</p>                                                                               |
| P05216-55 | <p>Western Institutional Review Board<br/> 3535 Seventh Avenue, SW<br/> Olympia WA, 98508-2029 98502-5010<br/> USA</p>                                                                                                                                                                                                   |
| P05216-56 | <p>WIRB<br/> 3535 7th Ave. Southwest<br/> Olympia WA, 98502<br/> USA</p>                                                                                                                                                                                                                                                 |
| P05216-57 | <p>John Hopkins Medicine Institutional Review Board<br/> 1620 McElderry Street Reed Hall B-130<br/> Reed Hall B-130<br/> Baltimore MD, 21205-1911<br/> USA</p>                                                                                                                                                           |
| P05216-58 | <p>Baylor College of Medicine<br/> One Baylor Plaza Rm 600 D<br/> Office of Research<br/> Rm 600 D<br/> Houston TX, 77030-3411<br/> USA</p>                                                                                                                                                                              |
| P05216-59 | <p>WIRB<br/> 3535 7th Ave. Southwest<br/> Olympia WA, 98502-5010<br/> USA</p>                                                                                                                                                                                                                                            |
| P05216-63 | <p>Ethik-Kommission des Fachbereichs Medizin der<br/> Johann Wolfgang Goethe-Universitaet<br/> Theodor-Stern-Kai 7</p>                                                                                                                                                                                                   |

| Protocol and Center Number | Responsible IRB Name and Address(es)                                                                                                                                                                                                                                                                                                   |
|----------------------------|----------------------------------------------------------------------------------------------------------------------------------------------------------------------------------------------------------------------------------------------------------------------------------------------------------------------------------------|
|                            | Frankfurt am Main<br>Frankfurt 60590<br>Germany                                                                                                                                                                                                                                                                                        |
| P05216-64                  | Ethik-Kommission des Fachbereichs Medizin der<br>Johann Wolfgang Goethe-Universitaet<br>Frankfurt am Main<br>Theodor-Stern-Kai 7<br>Frankfurt 60590<br>Germany<br><br>Landesamt fuer Gesundheit und Soziales Berlin<br>Geschaeftsstelle der Ethik-Kommission des<br>Saechsische Strasse 28<br>Landes Berlin<br>Berlin 10707<br>Germany |
| P05216-65                  | Ethik-Kkommission der Aerztekammer Nordrhein<br>Tersteegenstrasse 31<br>Duesseldorf 40474<br>Germany<br><br>Ethik-Kommission des Fachbereichs Medizin der<br>Johann Wolfgang Goethe-Universitaet<br>Theodor-Stern-Kai 7<br>Frankfurt am Main<br>Frankfurt 60590<br>Germany                                                             |
| P05216-66                  | Ethik-Kommission der Landesaeztekammer<br>Rheinland-Pfalz<br>Deutschhausplatz 3<br>Mainz 55116<br>Germany<br><br>Ethik-Kommission des Fachbereichs Medizin der<br>Johann Wolfgang Goethe-Universitaet<br>Theodor-Stern-Kai 7<br>Frankfurt am Main<br>Frankfurt 60590<br>Germany                                                        |
| P05216-67                  | Ethik-Kommission der Medizinischen Fakultaat der<br>Technischen Universitaet Muenchen<br>Ismaninger Str. 22<br>Muenchen 81675<br>Germany<br><br>Ethik-Kommission des Fachbereichs Medizin der<br>Johann Wolfgang Goethe-Universitaet<br>Theodor-Stern-Kai 7<br>Frankfurt am Main<br>Frankfurt 60590<br>Germany                         |
| P05216-68                  | Ethik-Kommission der Medizinischen Fakultaat der<br>Universitaet zu Koeln<br>Joseph-Stelzmann-Str. 20<br>Koeln 50931<br>Germany<br><br>Ethik-Kommission des Fachbereichs Medizin der<br>Johann Wolfgang Goethe-Universitaet                                                                                                            |



| Protocol and Center Number | Responsible IRB Name and Address(es)                                                                                                                                                                                                                                                                                       |
|----------------------------|----------------------------------------------------------------------------------------------------------------------------------------------------------------------------------------------------------------------------------------------------------------------------------------------------------------------------|
|                            | Theodor-Stern-Kai 7<br>Frankfurt am Main<br>Frankfurt 60590<br>Germany                                                                                                                                                                                                                                                     |
| P05216-69                  | Ethik-Kkommission der Medizinischen Fakultät<br>Heidelberg<br>Alte Glockengiesserei 11/1<br>Heidelberg 69115<br>Germany<br><br>Ethik-Kommission des Fachbereichs Medizin der<br>Johann Wolfgang Goethe-Universität<br>Frankfurt am Main<br>Theodor-Stern-Kai 7<br>Frankfurt 60590<br>Germany                               |
| P05216-70                  | Ethik-Kommission der Med. Fakultät der<br>Universität Duisburg-Essen<br>Universitätsklinikum Essen<br>Robert-Koch-Str. 9-11<br>Essen 45147<br>Germany<br><br>Ethik-Kommission des Fachbereichs Medizin der<br>Johann Wolfgang Goethe-Universität<br>Theodor-Stern-Kai 7<br>Frankfurt am Main<br>Frankfurt 60590<br>Germany |
| P05216-71                  | Azienda Ospedaliera Universitaria Policlinico Paolo<br>Giaccone<br>Via del Vespro, 127<br>Comitato Etico<br>Palermo 90127<br>Italy                                                                                                                                                                                         |
| P05216-72                  | Comitato Etico- A.O. San Giovanni Battista - Le<br>Molinette<br>Corso Bramante, 88<br>Torino 10126<br>Italy                                                                                                                                                                                                                |
| P05216-73                  | Azienda Ospedaliera Spedali Civili di Brescia<br>Comitato Etico<br>Piazzale Spedali Civili, 1<br>Comitato Etico<br>Brescia 25123<br>Italy                                                                                                                                                                                  |
| P05216-74                  | Azienda Ospedaliero-Universitaria Careggi<br>Comitato Etico<br>Viale Pieraccini, 28<br>Comitato Etico<br>Firenze 50139<br>Italy<br><br>Azienda Ospedaliero-Universitaria Careggi<br>CTO, Largo Palagi 1<br>Firenze 50139<br>Italy                                                                                          |

| Protocol and Center Number | Responsible IRB Name and Address(es)                                                                                                                                                                                                                                                                                                                                              |
|----------------------------|-----------------------------------------------------------------------------------------------------------------------------------------------------------------------------------------------------------------------------------------------------------------------------------------------------------------------------------------------------------------------------------|
| P05216-75                  | Azienda Ospedaliero (A.O.U.) Maggiore della Carita di Novara<br>Comitato Etico Interaziendale<br>Corso Mazzini 18<br>Novara, 28100<br>Italy                                                                                                                                                                                                                                       |
| P05216-76                  | Policlinico Umberto<br>Comitato Etico<br>Viale del Policlinico, 155<br>Comitato Etico<br>Roma 00161<br>Italy                                                                                                                                                                                                                                                                      |
| P05216-77                  | Azienda Ospedaliera Universitaria Policlinico Tor Vergata<br>Viale Oxford, 81<br>Comitato Etico<br>Roma 00133<br>Italy                                                                                                                                                                                                                                                            |
| P05216-78                  | Ospedale Casa Sollievo della Sofferenza-Istituto di Ricovero e Cura a Carattere Scientifico<br>Comitato Etico-Casa Sollievo Della Sofferenza<br>Viale Cappuccini 1<br>San Giovanni Rotondo (Foggia), 71013<br>Italy                                                                                                                                                               |
| P05216-79                  | Hospital Vall D`Hebron<br>Passeig Vall d'Hebron 119-129 08035<br>CEIC<br>Institut de Recerca, Planta 2<br>Barcelona<br>Spain                                                                                                                                                                                                                                                      |
| P05216-80                  | Hospital 12 de Octubre<br>Comite Etico de Investigacion Clinica<br>Ctra. de Andalucia - Km 5,4<br>Madrid 28041<br>Spain<br><br>Hospital Vall D`Hebron<br>Passeig Vall d'Hebron 119-129 08035<br>CEIC<br>Institut de Recerca, Planta 2<br>Barcelona<br>Spain                                                                                                                       |
| P05216-81                  | Hospital Puerta de Hierro<br>San Martin de Porres, 4<br>Comite Etico de Investigacion Clinica<br>Madrid 28035<br>Spain<br><br>Hospital Puerta de Hierro de Majadahonda<br>Comite Etico de Investigacion Clinica,<br>planta 1<br>C/ Manuel de Falla, 1 planta 1<br>Majadahonda, Madrid 28222<br>Spain<br><br>Hospital Vall D`Hebron<br>Passeig Vall d'Hebron 119-129 08035<br>CEIC |

| Protocol and Center Number | Responsible IRB Name and Address(es)                                                                                                                                                                                                                                                                                                    |
|----------------------------|-----------------------------------------------------------------------------------------------------------------------------------------------------------------------------------------------------------------------------------------------------------------------------------------------------------------------------------------|
|                            | <p>Institut de Recerca, Planta 2<br/>Barcelona<br/>Spain</p>                                                                                                                                                                                                                                                                            |
| P05216-82                  | <p>Hospital General Universitario de Valencia<br/>Comite Etico de Investigacion Clinica<br/>Avda. Tres Cruces, s/n<br/>Valencia 46014<br/>Spain</p> <p>Hospital Vall d'Hebron<br/>Comite Etico de Investigacion Clinica<br/>Institut de Recerca<br/>Passeig de Vall d'Hebron 119 – 129<br/>Barcelona, 08035<br/>Spain</p>               |
| P05216-83                  | <p>Hospital Clinic i Provincial<br/>Comite Etico de Investigacion Clinica<br/>Villarroel, 170<br/>Barcelona, 08036<br/>Spain</p> <p>Hospital Vall D'Hebron<br/>Passeig Vall d'Hebron 119-129 08035<br/>CEIC<br/>Institut de Recerca, Planta 2<br/>Barcelona<br/>Spain</p>                                                               |
| P05216-84                  | <p>Hospital Clinico Universitario de Valencia<br/>Comite Etico de Investigacion Clinica<br/>Avda. Blasco Ibanez, 17<br/>Comite Etico de Investigacion Clinica<br/>Valencia 46010<br/>Spain</p> <p>Hospital Vall D'Hebron<br/>Passeig Vall d'Hebron 119-129 08035<br/>CEIC<br/>Institut de Recerca, Planta 2<br/>Barcelona<br/>Spain</p> |
| P05216-85                  | <p>Comite Etico de Investigacion Clinica H. La Princesa<br/>Diego de Leon, 62<br/>Madrid 28006<br/>Spain</p> <p>Hospital Vall D'Hebron<br/>Passeig Vall d'Hebron 119-129 08035<br/>CEIC<br/>Institut de Recerca, Planta 2<br/>Barcelona<br/>Spain</p>                                                                                   |
| P05216-86                  | <p>Fundacion Hospital Alcorcon<br/>Comite Etico de Investigacion Clinica<br/>Alcorcon<br/>Budapest, 1<br/>Madrid 28922<br/>Spain</p>                                                                                                                                                                                                    |

| Protocol and Center Number | Responsible IRB Name and Address(es)                                                                                                                                                                                    |
|----------------------------|-------------------------------------------------------------------------------------------------------------------------------------------------------------------------------------------------------------------------|
|                            | Hospital Vall d'Hebron<br>Comitè Ètico de Investigaci3n Clìnica<br>Passeig de Vall d'Hebron 119 – 129<br>Barcelona, 08035<br>Spain                                                                                      |
| P05216-90                  | Hopital Erasme ULB Comitè d'Èthique<br>Route de Lennik 808<br>Bruxelles 1070<br>Belgium<br><br>UZ Gasthuisberg<br>Commissie voor Medische Èthiek / Klinisch<br>Onderzoek<br>Herestraat, 49 Leuven 3000<br>Belgium       |
| P05216-91                  | UZ Gasthuisberg Commissie voor Medische Èthiek /<br>Klinisch Onderzoek<br>Herestraat, 49<br>Leuven 3000<br>Belgium                                                                                                      |
| P05216-92                  | University Health Network<br>Research Ethics Board<br>700 University Avenue<br>Toronto ON, M5G 1Z5<br>Canada                                                                                                            |
| P05216-93                  | Institutional Review Board Services<br>372 Hollandview Trail, suite 300<br>Aurora ON, L4G 0A5<br>Canada                                                                                                                 |
| P05216-94                  | Mount Sinai Hospital REB<br>600 University Avenue, Rm 1003B<br>Toronto ON, M5G 1X5<br>Canada                                                                                                                            |
| P05216-95                  | Institutional Review Board Services<br>372 Hollandview Trail, suite 300<br>Aurora ON, L4G 0A5<br>Canada                                                                                                                 |
| P05216-96                  | UWO<br>Office of Research Ethics<br>1393 Western Road, Room 4180<br>London ON, N6A 5C1<br>Canada<br><br>UWO<br>London Health Sciences Centre<br>University Campus Site<br>339 Windemere<br>London ON, N6A 5A5<br>Canada |
| P05216-97                  | Health Research Ethics Board<br>Biomedical Panel<br>213 Heritage Medical Research Building<br>Edmonton AB, T6G 2S2<br>Canada                                                                                            |

| Protocol and Center Number | Responsible IRB Name and Address(es)                                                                                                                                                                                                                                                                           |
|----------------------------|----------------------------------------------------------------------------------------------------------------------------------------------------------------------------------------------------------------------------------------------------------------------------------------------------------------|
|                            | <p>Health Research Ethics Board<br/> 308 Campus Tower<br/> Edmonton AB, T6G 0K8<br/> Canada</p>                                                                                                                                                                                                                |
| P05216-99                  | <p>University of Puerto Rico - Medical Science Campus<br/> PO Box 365067<br/> Institutional Review Board<br/> San Juan 00936-5067<br/> Puerto Rico</p> <p>Western Institutional Review Board<br/> 3535 7th Ave. SW<br/> Olympia WA, 98502-5010<br/> USA</p>                                                    |
| P05216-100                 | <p>Western Institutional Review Board<br/> 3535 7th Ave. SW<br/> Olympia WA, 98502-5010<br/> USA</p>                                                                                                                                                                                                           |
| P05216-101                 | <p>Western Institutional Review Board<br/> 3535 7th Ave. SW<br/> Olympia WA, 98502-5010<br/> USA</p>                                                                                                                                                                                                           |
| P05216-102                 | <p>Academic Medical Center, Medical Ethical<br/> Committee<br/> Meibergdreef 9<br/> Amsterdam 1105 AZ<br/> Netherlands</p>                                                                                                                                                                                     |
| P05216-106                 | <p>Ethik-Kommission der Med. Fakultät der<br/> Universität Tübingen<br/> Schleichstrasse 8<br/> Tübingen 72076<br/> Germany</p> <p>Ethik-Kommission des Fachbereichs Medizin der<br/> Johann Wolfgang Goethe-Universität<br/> Frankfurt am Main<br/> Theodor-Stern-Kai 7<br/> Frankfurt 60590<br/> Germany</p> |
| P05216-107                 | <p>Ethikkommission der Universität Ulm<br/> Helmholtzstr. 20 (Oberer Eselsberg)<br/> Ulm 89081<br/> Germany</p> <p>Ethik-Kommission des Fachbereichs Medizin der<br/> Johann Wolfgang Goethe-Universität<br/> Frankfurt am Main<br/> Theodor-Stern-Kai 7<br/> Frankfurt 60590<br/> Germany</p>                 |
| P05216-108                 | <p>Ethik-Kommission. Universität. zu Luebeck<br/> Ratzeburger Allee 160<br/> Luebeck 23538<br/> Germany</p> <p>Ethik-Kommission des Fachbereichs Medizin der<br/> Johann Wolfgang Goethe-Universität<br/> Frankfurt am Main</p>                                                                                |

| Protocol and Center Number | Responsible IRB Name and Address(es)                                                                                                                                                                                                                                                                       |
|----------------------------|------------------------------------------------------------------------------------------------------------------------------------------------------------------------------------------------------------------------------------------------------------------------------------------------------------|
|                            | Theodor-Stern-Kai 7<br>Frankfurt 60590<br>Germany                                                                                                                                                                                                                                                          |
| P05216-109                 | Ethik-Kommission der Albert-Ludwigs-Universitaet<br>Freiburg<br>Elsaesser Strasse 2m, Haus 1a<br>Freiburg 79110<br>Germany<br><br>Ethik-Kommission des Fachbereichs Medizin der<br>Johann Wolfgang Goethe-Universitaet<br>Frankfurt am Main<br>Theodor-Stern-Kai 7<br>Frankfurt 60590<br>Germany           |
| P05216-110                 | Ethikkommission der Medizinischen Fakulaet der<br>Universitaet Wuerzburg<br>Josef-Schneider-Str. 2, D7<br>Wuerzburg 97080<br>Germany<br><br>Ethik-Kommission des Fachbereichs Medizin der<br>Johann Wolfgang Goethe-Universitaet<br>Frankfurt am Main<br>Theodor-Stern-Kai 7<br>Frankfurt 60590<br>Germany |
| P05216-111                 | The Ottawa Hospital Research Ethics Board<br>Ottawa Hospital Civic Campus<br>751 Parkdale Avenue, Suite 106<br>Ottawa ON, K1Y 1J7<br>Canada                                                                                                                                                                |
| P05216-112                 | Clinical Research Ethics Board<br>828 West 10th Ave Rm 210<br>Vancouver BC, V6K 1L8<br>Canada<br><br>The Office of Research Services<br>102-6190 Agronomy Road Vancouver BC, V6T 1Z3<br>Canada                                                                                                             |
| P05216-113                 | Health Research Ethics Board<br>308 Campus Tower<br>Edmonton AB,<br>Canada<br><br>Health Research Ethics Board<br>Biomedical Panel<br>213 Heritage Medical Research Building<br>Edmonton AB, T6G 2S2<br>Canada                                                                                             |
| P05216-114                 | CHUM - Hopital Notre-Dame<br>3981 St. Laurent blvd., Mezz 2, Rm M-209<br>Montreal QC, H2W 1Y5<br>Canada                                                                                                                                                                                                    |
| P05216-115                 | University Health Network REB<br>Research Ethics Board                                                                                                                                                                                                                                                     |

| Protocol and Center Number | Responsible IRB Name and Address(es)                                                                                                                                                                                                                                                          |
|----------------------------|-----------------------------------------------------------------------------------------------------------------------------------------------------------------------------------------------------------------------------------------------------------------------------------------------|
|                            | 700 University Avenue<br>Toronto ON, M5G 1Z5<br>Canada                                                                                                                                                                                                                                        |
| P05216-116                 | MUHC - Royal Victoria Hospital<br>Research Ethics Board<br>687 Pine Avenue West, Room #511-08<br>Montreal QC, H3A 1A1<br>Canada                                                                                                                                                               |
| P05216-117                 | Ospedale Fatebenefratelli e Oftalmico di Milano<br>Comitato Etico Indipendente<br>Corso di Porta Nuova 23<br>Milano<br>Italy                                                                                                                                                                  |
| P05216-119                 | CPP "Sud-Est II"<br>Hopital Hotel Dieu<br>1 Place de l'Hopital, Porte 16<br>Lyon Cedex 02 69288<br>France                                                                                                                                                                                     |
| P05216-120                 | CPP "Sud-Est II"<br>Hopital Hotel Dieu<br>1 Place de l'Hopital, Porte 16<br>Lyon Cedex 02 69288<br>France                                                                                                                                                                                     |
| P05216-121                 | CPP "Sud-Est II"<br>1 Place de l'Hopital, Porte 16 Hopital Hotel Dieu<br>Hopital Hotel Dieu<br>Lyon Cedex 02 69288<br>France                                                                                                                                                                  |
| P05216-122                 | CPP "Sud-Est II"<br>Hopital Hotel Dieu<br>1 Place de l'Hopital, Porte 16<br>Lyon Cedex 02 69288<br>France                                                                                                                                                                                     |
| P05216-123                 | CPP "Sud-Est II"<br>Hopital Hotel Dieu<br>1 Place de l'Hopital, Porte 16<br>Lyon Cedex 02 69288<br>France                                                                                                                                                                                     |
| P05216-124                 | IRB for Health Sciences Research<br>University of Virginia<br>One Morton Drive Suite 400<br>Charlottesville VA, 22908<br>USA                                                                                                                                                                  |
| P05216-125                 | Biomedical Research Alliance of New York<br>Institutional Review Board<br>1981 Marcus Avenue, Suite 210<br>Lake Success NY, 11042<br>USA<br><br>Biomedical Research Alliance of New York, LLC<br>Institutional Review Board<br>225 Community Drive., Suite 100<br>Great Neck NY, 11021<br>USA |

| Protocol and Center Number | Responsible IRB Name and Address(es)                                                                                                                                                                            |
|----------------------------|-----------------------------------------------------------------------------------------------------------------------------------------------------------------------------------------------------------------|
| P05216-127                 | Washington University School of Medicine<br>Human Research Protection Office<br>22 North Euclid Avenue Suite 233<br>Suite 233<br>St. Louis MO, 63108<br>USA                                                     |
| P05216-128                 | Western Institutional Review Board<br>3535 Seventh Avenue, SW<br>Olympia WA, 98502SA                                                                                                                            |
| P05216-129                 | Institutional Review Board<br>Baylor Research Institute<br>3310 Live Oak Street Suite 501<br>Dallas TX, 75204<br>USA                                                                                            |
| P05216-130                 | University of Maryland<br>Institutional Review Board<br>655 West Baltimore Street<br>Baltimore MD, 21201<br>USA                                                                                                 |
| P05216-131                 | Lahey Clinic IRB<br>Lahey Clinic<br>41 Mall Road<br>Burlington MA, 01805<br>USA                                                                                                                                 |
| P05216-132                 | Mayo Clinic IRB<br>201 Building 440<br>200 First Street SW<br>Rochester NY, 55905<br>USA                                                                                                                        |
| P05216-133                 | Brooke Army Medical Center IRB<br>Dept of Clinical Investigations<br>3400 Rawley E. Chambers, Suite A<br>San Antonio TX, 78234<br>USA                                                                           |
| P05216-134                 | Maine Medical Center Institutional Review Board<br>81 Research Drive<br>Scarborough ME, 04074<br>USA                                                                                                            |
| P05216-135                 | University of Kentucky IRB<br>315 Kinkead Hall<br>Lexington KY, 40506-0057<br>USA                                                                                                                               |
| P05216-136                 | University of Vermont Institutional Review Board<br>231 Rowell Building<br>Burlington VT, 05405<br>USA<br><br>University of Vermont Institutional Review Board<br>245 South Park<br>Colchester VT, 05466<br>USA |
| P05216-138                 | SUNY Upstate Medical University Institutional<br>Review Board<br>750 East Adams Street 1254 Weiskotten Hall<br>for the Protection of Human Subjects<br>1254 Weiskotten Hall                                     |



| Protocol and Center Number | Responsible IRB Name and Address(es)                                                                                                                                                                                                                                                                                 |
|----------------------------|----------------------------------------------------------------------------------------------------------------------------------------------------------------------------------------------------------------------------------------------------------------------------------------------------------------------|
|                            | Syracuse NY, 13210<br>USA                                                                                                                                                                                                                                                                                            |
| P05216-140                 | <p>University of Michigan Medical School IRB<br/>517 W. William Argus 1<br/>Argus 1<br/>Ann Arbor MI, 48103<br/>USA</p> <p>University of Michigan Medical School<br/>Institutional Review Board for Human Subject<br/>Research<br/>2800 Plymouth, Building 200, Room 2086<br/>Ann Arbor, MI 48109 – 2800<br/>USA</p> |
| P05216-142                 | The Nebraska Medical Center Institutional Review<br>Board<br>987830 The Nebraska Medical Center ARS 3000<br>Office of Regulatory Affairs<br>ARS 3000<br>Omaha NE, 68198<br>USA                                                                                                                                       |
| P05216-143                 | WIRB<br>3535 7th Ave. Southwest<br>Olympia WA, 98502<br>USA                                                                                                                                                                                                                                                          |
| P05216-144                 | WIRB<br>3535 7th Ave. Southwest<br>Olympia WA, 98502<br>USA                                                                                                                                                                                                                                                          |
| P05216-145                 | Western Institutional Review Board<br>3535 Seventh Ave., SW<br>Olympia WA, 98502<br>USA                                                                                                                                                                                                                              |
| P05216-146                 | Western Institutional Review Board<br>3535 Seventh Avenue, SW<br>Olympia WA, 98502<br>USA                                                                                                                                                                                                                            |
| P05216-147                 | Kaiser Permanente Northern IRB (KPNC IRB)<br>1800 Harris 16th Floor<br>Oakland CA, 94612<br>USA                                                                                                                                                                                                                      |
| P05216-150                 | Kaiser Permanente of the Mid-Atlantic States<br>2101 East Jefferson Street<br>Institutional Review Board<br>Rockville MD, 20852<br>USA                                                                                                                                                                               |
| P05216-152                 | Western Institutional Review Board<br>3535 Seventh Avenue, SW<br>Olympia WA, 98502<br>USA                                                                                                                                                                                                                            |
| P05216-153                 | Western Institutional Review Board<br>3535 7th Avenue Southwest PO Box 12029<br>Olympia WA, 98502-5010<br>USA                                                                                                                                                                                                        |
| P05216-156                 | Hennepin County Medical Center                                                                                                                                                                                                                                                                                       |

| Protocol and Center Number | Responsible IRB Name and Address(es)                                                                                                                                                                                                                                                                    |
|----------------------------|---------------------------------------------------------------------------------------------------------------------------------------------------------------------------------------------------------------------------------------------------------------------------------------------------------|
|                            | Minn. Med Rsrch FNDN Human Subjects Research<br>Committee<br>914 So 8th St<br>900 HFA Bldg<br>Minneapolis MN, 55404<br>USA                                                                                                                                                                              |
| P05216-157                 | University of Pennsylvania<br>3624 Market Street Suite 301S<br>Institutional Review Board<br>Philadelphia PA, 19104<br>USA                                                                                                                                                                              |
| P05216-159                 | CHU Brugmann<br>Place Arthur Van Gehuchten, 4 Ethics Committee<br>Site Victor Horta<br>Ethics Committee<br>Bruxelles 1020<br>Belgium<br><br>UZ Gasthuisberg<br>Herestraat, 49<br>Commissie voor Medische Ethiek / Klinisch<br>Onderzoek<br>Leuven 3000<br>Belgium                                       |
| P05216-161                 | Hospital Ramon y Cajal<br>Ctra. de Colmenar Viejo, Km. 9,1<br>Comite Etico de Investigacion Clinica<br>Madrid, 28034<br>Spain<br><br>Hospital Vall d'Hebron<br>Passeig de Vall d'Hebron 119 – 129<br>Comite Etico de Investigacion Clinica<br>Barcelona, 08035<br>Spain                                 |
| P05216-162                 | Hospital Universitario Reina Sofia<br>Avda. Menendez Pidal, s/n<br>Comite Etico de Investigacion Clinica<br>Cordoba 14004<br>Spain<br><br>Hospital Vall D'Hebron<br>Passeig Vall d'Hebron 119-129 08035 Institut de<br>Recerca, Planta 2<br>CEIC<br>Institut de Recerca, Planta 2<br>Barcelona<br>Spain |
| P05216-166                 | Western Institutional Review Board<br>3535 Seventh Avenue, SW<br>Olympia WA, 98502<br>USA                                                                                                                                                                                                               |
| P05216-168                 | WIRB<br>3535 7th Ave. Southwest<br>Olympia WA, 98502<br>USA                                                                                                                                                                                                                                             |
| P05216-170                 | Western Institutional Review Board<br>3535 Seventh Ave, SW                                                                                                                                                                                                                                              |

| Protocol and Center Number | Responsible IRB Name and Address(es)                                                                                                                          |
|----------------------------|---------------------------------------------------------------------------------------------------------------------------------------------------------------|
|                            | Olympia WA, 98502<br>USA                                                                                                                                      |
| P05216-171                 | Western Institutional Review Board<br>3535 Seventh Avenue, SW<br>Olympia WA, 98502<br>USA                                                                     |
| P05216-174                 | WIRB<br>3535 7th Ave. SW<br>Olympia WA, 98502-5010<br>USA                                                                                                     |
| P05216-175                 | University of California Irvine<br>4199 Campus Dr., Ste 300 Office of Research<br>Admin<br>Human Research Protections Program<br>Irvine CA, 92697-7600<br>USA |
| P05216-176                 | Mayo Clinic<br>200 First Street SW<br>Institutional Review Board<br>Rochester MN, 55905<br>USA                                                                |
| P05216-178                 | Kansas City VA Medical Center<br>4801 E. Linwood Blvd. 151<br>IRB<br>Kansas City MO, 64128<br>USA                                                             |
| P05216-179                 | Kaiser Permanente Southern California<br>393 East Walnut St., 2nd Floor<br>Institutional Review Board<br>Pasadena CA, 91188<br>USA                            |
| P05216-180                 | Walter Reed Army Medical Center<br>6900 Georgia Ave., NW<br>Human Use Committee<br>Washington DC, 20307<br>USA                                                |
| P05216-181                 | Western Institutional Review Board<br>3535 Seventh Avenue, SW<br>Olympia WA, 98502<br>USA                                                                     |
| P05216-182                 | Western Institutional Review Board<br>3535 7th Ave. SW<br>Olympia WA, 98502<br>USA                                                                            |
| P05216-183                 | St. John's Institutional Review Board<br>1235 East Cherokee Street<br>Springfield MO, 65804<br>USA                                                            |
| P05216-184                 | Kaiser Permanente Northern IRB (KPNC IRB)<br>1800 Harris 16th Floor<br>Oakland CA, 94612<br>USA                                                               |
| P05216-185                 | Western Institutional Review Board<br>3535 Seventh Avenue, SW<br>Olympia WA, 98502<br>USA                                                                     |

| Protocol and Center Number | Responsible IRB Name and Address(es)                                                                                                                                                                                                                                                                                                           |
|----------------------------|------------------------------------------------------------------------------------------------------------------------------------------------------------------------------------------------------------------------------------------------------------------------------------------------------------------------------------------------|
| P05216-186                 | <p>Comite de Docencia e investigacion - Fundacion CIDEA<br/> Billinghamurst 1677<br/> Buenos Aires C1425DTG<br/> Argentina</p> <p>Comite Independiente de Etica para Ensayos en Farmacologia Clinica<br/> J. E. Uriburu 774 Piso 1<br/> Fundacion de Estudios Farmacologicos y de Medicamentos<br/> Buenos Aires (C1027AAP)<br/> Argentina</p> |
| P05216-187                 | <p>Comite de Docencia e Investigacion del Hospital Provincial del Centenario<br/> Urquiza 3101<br/> Rosario. Santa Fe S2002KDS<br/> Argentina</p>                                                                                                                                                                                              |
| P05216-188                 | <p>Comite de Bioetica Universitario Austral<br/> Av. Juan Domingo Peron 1500 Facultad de Cs Biomedicas<br/> Unidad de Investigacion<br/> Facultad de Cs Biomedicas<br/> Pilar<br/> Prov. de Buenos Aires B1629ODT<br/> Argentina</p>                                                                                                           |
| P05216-189                 | <p>Comite de Revision Institucional Hospital Britanico Perdriel 74<br/> Ciudad de Buenos Aires C1280AEB<br/> Argentina</p>                                                                                                                                                                                                                     |
| P05216-190                 | <p>Comite Independiente de Etica para Ensayos en Farmacologia Clinica<br/> J. E. Uriburu 774 Piso 1<br/> Fundacion de Estudios Farmacologicos y de Medicamentos<br/> Bs As C1027AAP<br/> Argentina</p>                                                                                                                                         |
| P05216-193                 | <p>CPP "Sud-Est II"<br/> 1 Place de l'Hopital, Porte 16<br/> Hopital Hotel Dieu<br/> Lyon Cedex 02 69288<br/> France</p>                                                                                                                                                                                                                       |
